# Supplementary material for: Combination therapy with topical minoxidil and nano-microneedle-assisted fibroblast growth factor for male androgenetic alopecia: a randomized controlled trial in Chinese patients
Source: PubMed Central journal article supplement — Chin Med J (Engl). 2020 Nov 5;134(7):851–3. doi: 10.1097/CM9.0000000000001195 (PMC8104149; doi:10.1097/cm9.0000000000001195), 2020-11-05
Supplement: cm9-134-851-s001.pdf [file cm9-134-851-s001.pdf]

**Supplementary Table 1: Basic characteristics of 40 patients with MAA**

| Items                                        | Group S    | Group M    | Group F    | Group MF   |
|----------------------------------------------|------------|------------|------------|------------|
| Age (years)                                  | 36.40±8.19 | 35.30±8.81 | 35.10±7.26 | 36.90±7.53 |
| Duration of hair loss (years)                | 4.30±2.90  | 4.40±2.22  | 4.10±1.85  | 3.70±1.83  |
| Hamilton-Norwood classification ( <i>n</i> ) |            |            |            |            |
| II                                           | 2          | 3          | 3          | 2          |
| III                                          | 3          | 2          | 1          | 2          |
| IV                                           | 3          | 2          | 3          | 3          |
| V                                            | 2          | 2          | 2          | 2          |
| VI                                           | 0          | 1          | 1          | 1          |
| Previous treatment ( <i>n</i> )              |            |            |            |            |
| Never treated                                | 3          | 6          | 4          | 5          |
| Minoxidil                                    | 3          | 2          | 3          | 2          |
| Propecia                                     | 2          | 1          | 2          | 1          |
| Traditional Chinese medicine                 | 2          | 1          | 1          | 2          |

Groups S, M, F, and MF were administered saline, 5% topical minoxidil solution, FGF; and a combination of 5% topical minoxidil and FGF, respectively, for 16 weeks. MAA: Male androgenic alopecia; FGF: Fibroblast growth factors.

**Supplementary Table 2: Hair density among groups at baseline and after 16-week treatment (cm<sup>2</sup>)**

| Time           | Group S      | Group M      | Group F      | Group MF     | P value among groups |
|----------------|--------------|--------------|--------------|--------------|----------------------|
| Baseline       | 105.27±16.66 | 104.12±30.54 | 91.53±37.98  | 100.92±27.79 | 0.716                |
| 16 weeks       | 105.41±11.97 | 129.07±27.52 | 118.88±41.41 | 155.01±24.64 | 0.003 <sup>†</sup>   |
| <i>P</i> value | 0.951        | 0.003*       | 0.002*       | 0.001*       |                      |

Data are expressed as mean ± standard deviation (SD). *P* <0.05 was considered statistically significant. \*Paired *t*-test was applied to analyze hair density at baseline and after 16 weeks. <sup>†</sup> One-Way ANOVA and LSD test were applied to analyze the difference of hair density among groups.

**Supplementary Table 3: Hair diameter among groups at baseline and after 16-week treatment (μm)**

| Time           | Group S     | Group M     | Group F     | Group MF    | <i>P</i> value among groups |
|----------------|-------------|-------------|-------------|-------------|-----------------------------|
| Baseline       | 67.00±10.59 | 70.00±16.33 | 56.00±11.74 | 63.00±16.36 | 0.152                       |
| 16 weeks       | 68.00±13.98 | 77.00±13.37 | 61.00±16.63 | 70.00±15.63 | 0.141                       |
| <i>P</i> value | 0.678       | 0.025*      | 0.213       | 0.010*      |                             |

Data are expressed as mean ± standard deviation (SD). \* Paired *t*-test was applied to analyze hair diameter at baseline and after 16 weeks, *P* <0.05 was considered statistically significant.

**Supplementary Table 4: Follicular unit density among groups at baseline and after 16-week treatment (/cm<sup>2</sup>)**

| Time           | Group S      | Group M      | Group F      | Group MF     | <i>P</i> value among groups |
|----------------|--------------|--------------|--------------|--------------|-----------------------------|
| Baseline       | 118.64±23.72 | 130.27±36.34 | 109.20±32.80 | 109.93±19.80 | 0.342                       |
| 16 weeks       | 120.10±22.63 | 137.83±27.71 | 139.95±24.48 | 130.02±15.65 | 0.225                       |
| <i>P</i> value | 0.651        | 0.153        | 0.031*       | 0.007*       |                             |

\*Paired *t*-test was applied to analyze hair follicular at baseline and after 16 weeks, *P* <0.05 was considered statistically significant.

**Supplementary Table 5: Assessment of patients and investigators**

| Groups         | Assessment of patients      |           |                              | Assessment of investigators |           |                              |
|----------------|-----------------------------|-----------|------------------------------|-----------------------------|-----------|------------------------------|
|                | Worse                       | No change | Better                       | Worse                       | No change | Better                       |
| Group S        | 0                           | 9/10      | 1/10                         | 0                           | 9/10      | 1/10                         |
| Group M        | 0                           | 0/10      | 10/10                        | 0                           | 3/10      | 7/10                         |
| Group F        | 0                           | 2/10      | 8/10                         | 0                           | 4/10      | 6/10                         |
| Group MF       | 0                           | 1/10      | 9/10                         | 0                           | 2/10      | 8/10                         |
| <i>P</i> value | <i>P</i> >0.05 <sup>a</sup> |           | <i>P</i> <0.05 <sup>*c</sup> | <i>P</i> >0.05 <sup>b</sup> |           | <i>P</i> <0.05 <sup>*d</sup> |

Kruskal-Wallis H test was used for analysis of assessment of patients and investigators between groups, *P* <0.05 was considered statistically significant. <sup>a, b</sup> There was no significant statistically difference among group M, F and MF according to assessment of patients or investigators (*P*>0.05). <sup>\*c, \*d</sup> There was significant statistically difference among four groups according to assessment of patients and investigators (*P* <0.05).
